# Supplementary material for: Long-Term Treatment with Dimethyl Fumarate for Plaque Psoriasis in Routine Practice: Good Overall Effectiveness and Positive Effect on Impactful Areas
Source: Springer Nature journal article supplement (doi:10.1007/s13555-022-00714-0), 2022-04-11
Supplement: MOESM1 [file 20302004]

**Long-term treatment with dimethyl fumarate for plaque psoriasis in routine practice: good overall effectiveness and positive effect on impactful areas**

Matthias Augustin<sup>1</sup>, Lilla Landeck<sup>2</sup>, Sebastian Diemert<sup>3</sup>, Khusru Asadullah<sup>4</sup>, Urte Hammann<sup>5</sup>, Konstantin Ertner<sup>6</sup>, Ina Hadshiew<sup>7</sup>

<sup>1</sup> Institute for Health Services Research in Dermatology and Nursing (IVDP), University Medical Center Hamburg-Eppendorf (UKE), Hamburg, Germany

<sup>2</sup> Ernst von Bergmann General Hospital, Potsdam, Germany

<sup>3</sup> Almirall Hermal GmbH, Reinbek, Germany

<sup>4</sup> Department of Dermatology, Venereology and Allergology, Charité - Universitätsmedizin Berlin, Berlin, Germany, and Hautarztpraxis Prof. Dr. med. K. Asadullah, Potsdam, Germany

<sup>5</sup> Hautarztpraxis Dr. U. Hammann, Stade, Germany

<sup>6</sup> Hautarztpraxis Dr. K. Ertner, Nürnberg, Germany

<sup>7</sup> Derma-Köln, Cologne, Germany

**Corresponding author:**

Prof. Dr. med. Matthias Augustin

Director, Institute for Health Services Research in Dermatology and Nursing (IVDP)

University Medical Center Hamburg-Eppendorf (UKE)

Martinistr. 52, 20246 Hamburg, Germany

Phone: +49 40 7410 55428

E-mail: m.augustin@uke.de

## SUPPLEMENTARY MATERIAL

**Figure S1.** Change in BSA from baseline to week 52

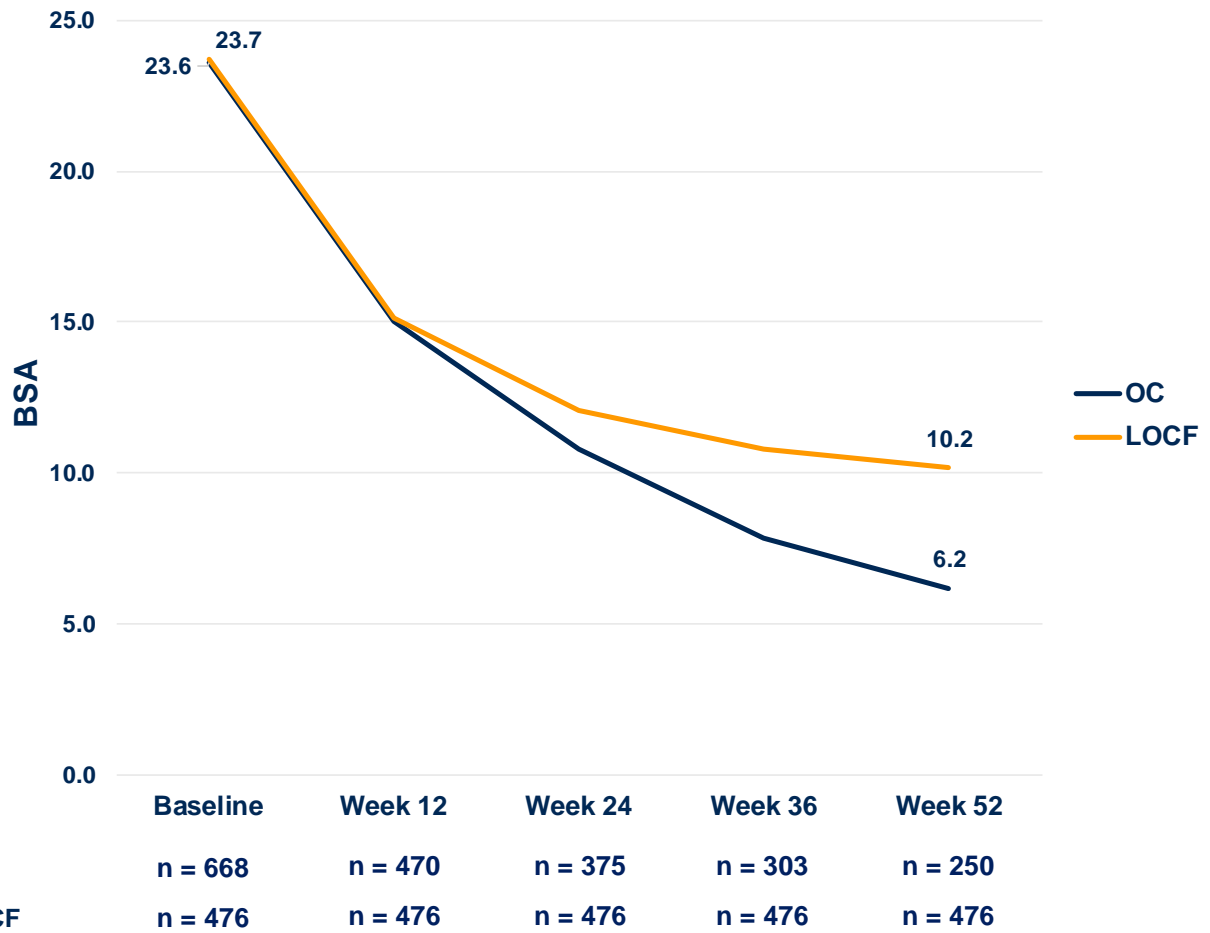

$p < 0.001$  vs. baseline for any visit and OC and LOCF, respectively, Wilcoxon signed-rank test. Abbreviations: BSA – body surface area, LOCF – last observation carried forward, OC – observed cases

**Figure S2.**

**a** – Change of nail psoriasis from baseline severity

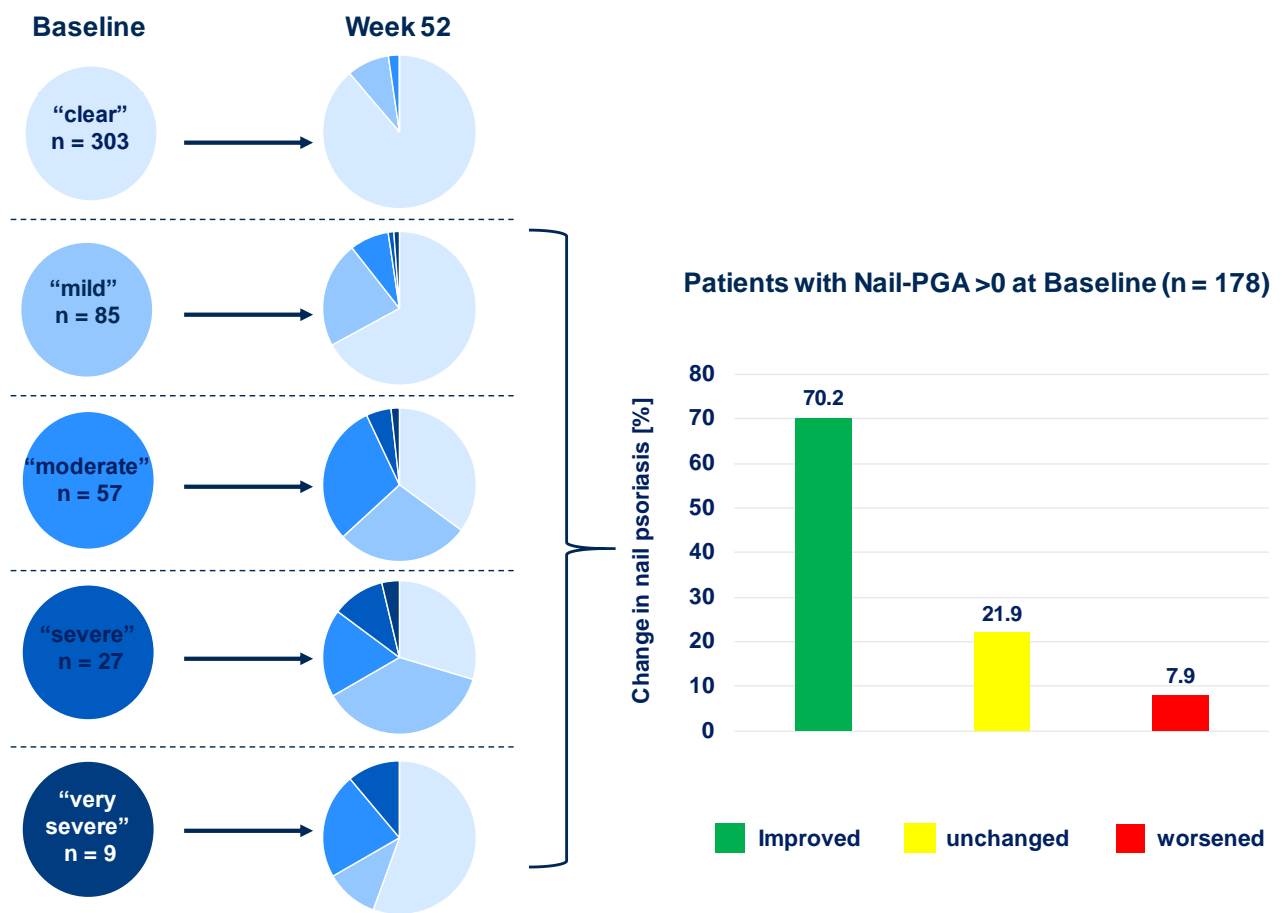

LOCF, n=481. Abbreviations: LOCF – last observation carried forward, PGA – Physician Global Assessment

**b – Improvement of palmoplantar psoriasis from baseline severity**

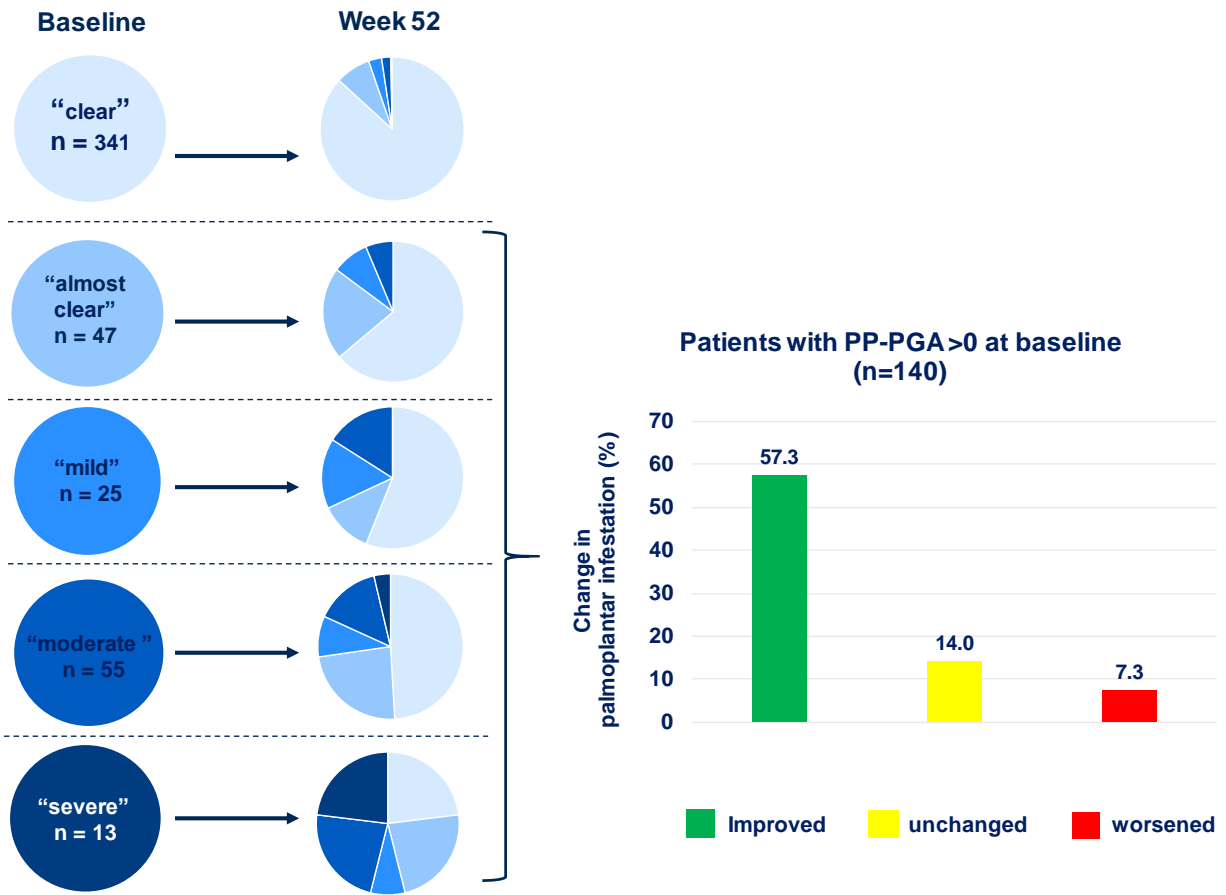

LOCF, n=481. Abbreviations: LOCF – last observation carried forward, PP-PGA – palmoplantar Physician Global Assessment

**Figure S3.** Proportion of patients with no or only mild pruritus

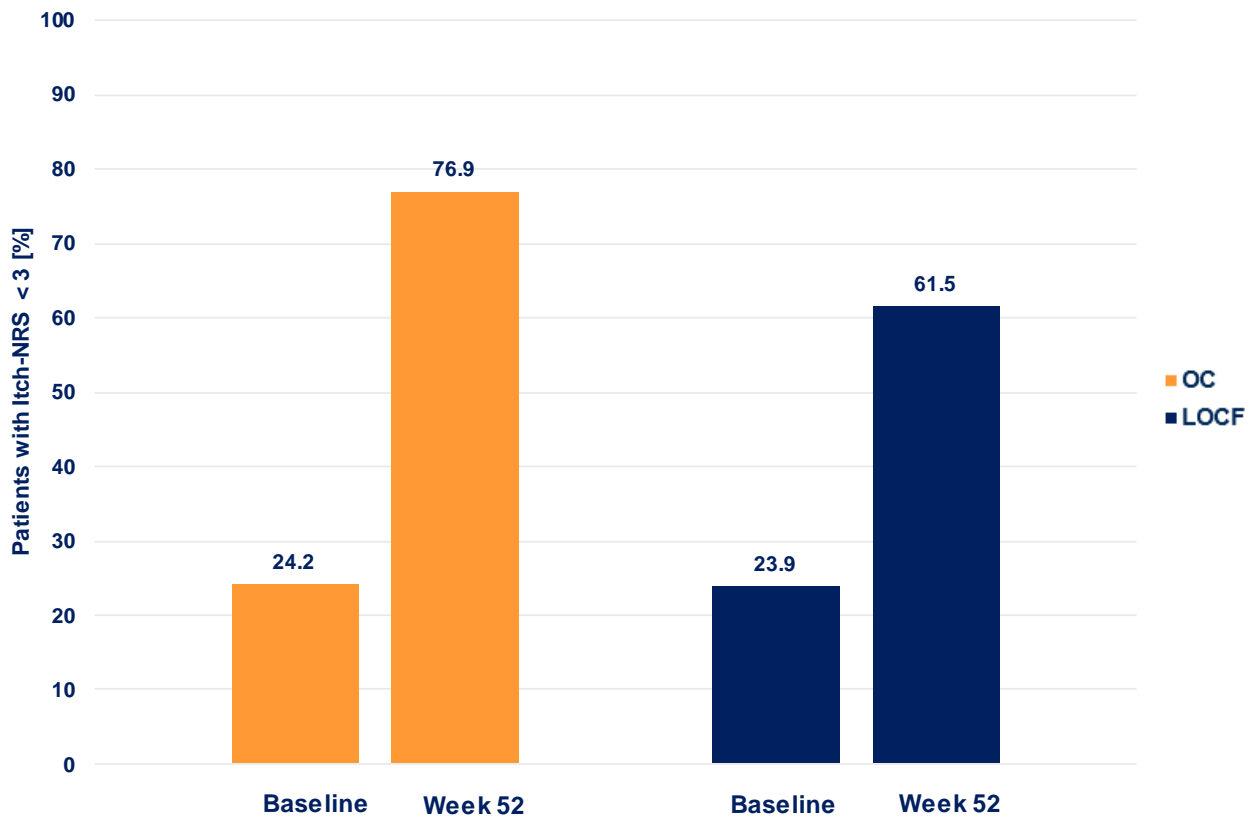

n = 660 (OC baseline), n = 251 (OC week 52), n = 473 (LOCF); p < 0,001 vs. baseline, using OC and LOCF, McNemar test. Abbreviations: LOCF – last observation carried forward, NRS – numerical rating scale, OC – observed cases

**Figure S4.** Main reason for therapy discontinuation

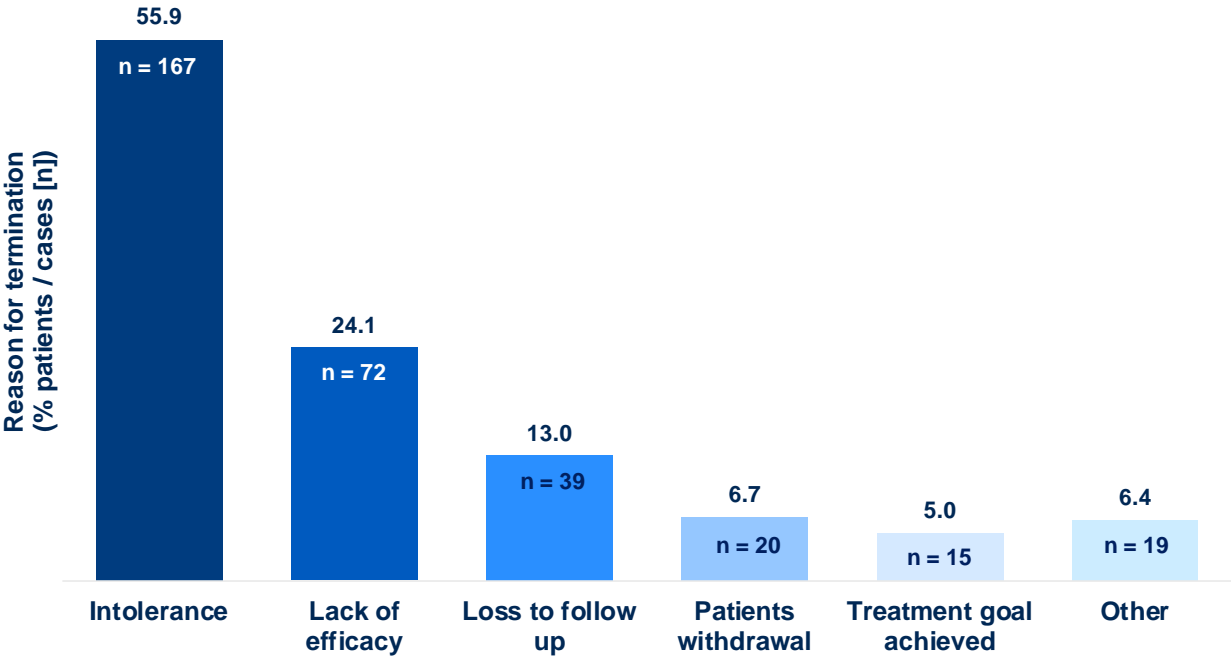

n = 299, 332 reasons for early treatment termination (more than 1 reason was possible per patient)
